# Supplementary material
Source: ML conference proceedings conference paper supplement (https://proceedings.neurips.cc/paper_files/paper/2010/hash/eb160de1de89d9058fcb0b968dbbbd68-Abstract.html)
Supplement: Supplementary file [file eb160de1de89d9058fcb0b968dbbbd68-Supplemental.zip]

---

# Towards Holistic Scene Understanding: Feedback Enabled Cascaded Classification Models Supplementary Material

---

Congcong Li, Adarsh Kowdle, Ashutosh Saxena, Tsuhan Chen  
Cornell University, Ithaca, NY.  
{cl1758, apk64}@cornell.edu,  
asaxena@cs.cornell.edu, tsuhan@ece.cornell.edu

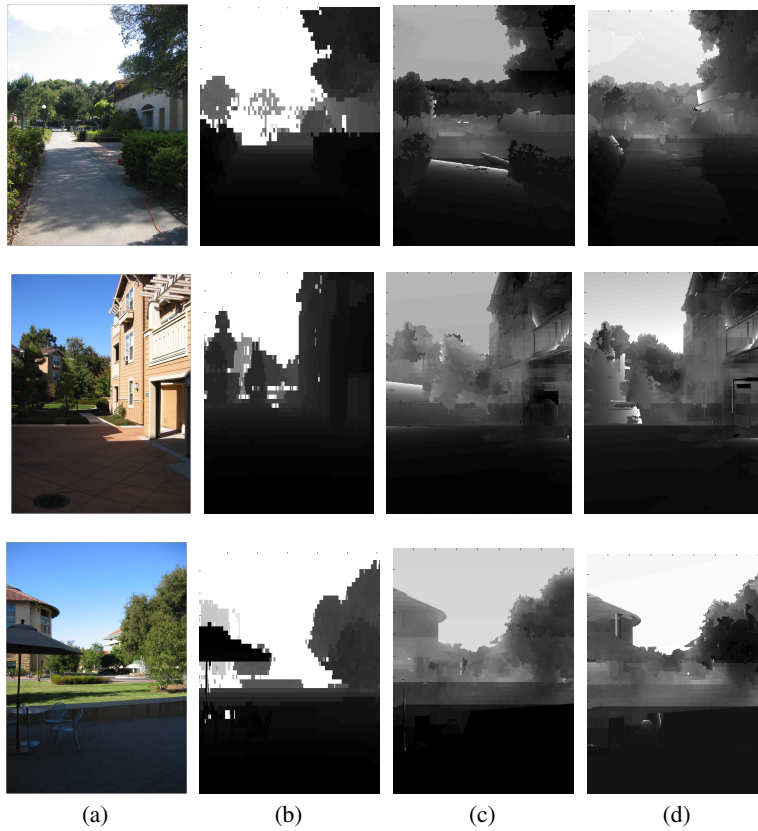

Figure 1: (a) Image from the dataset; (b) Ground truth; (c) Result obtained using CCM; (d) Result obtained using the proposed FE-CCM. (Best viewed in color)

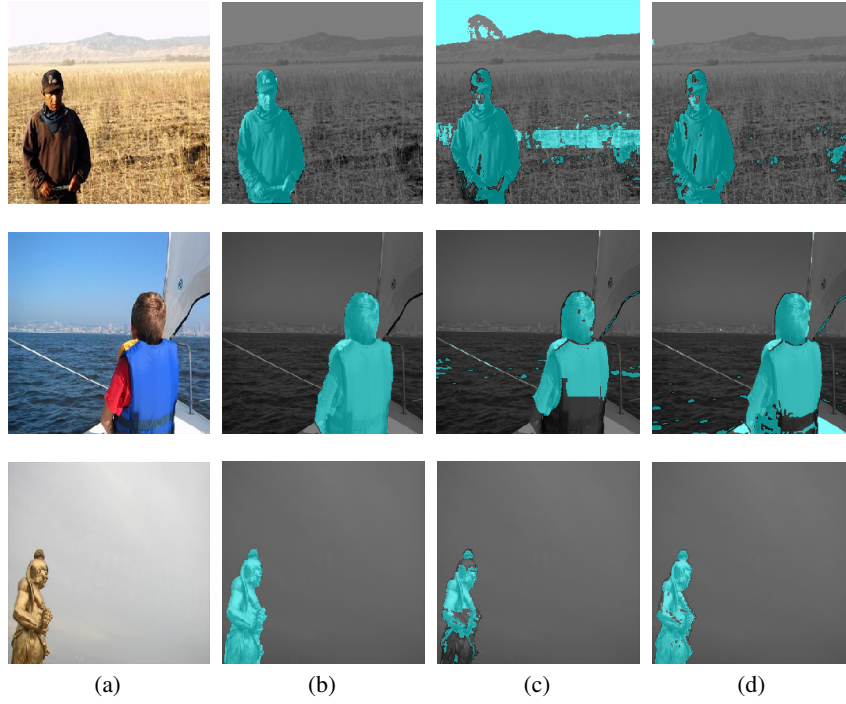

Figure 2: (a) Image from the dataset; (b) Ground truth; (c) Result obtained using CCM; (d) Result obtained using the proposed FE-CCM. (Best viewed in color)

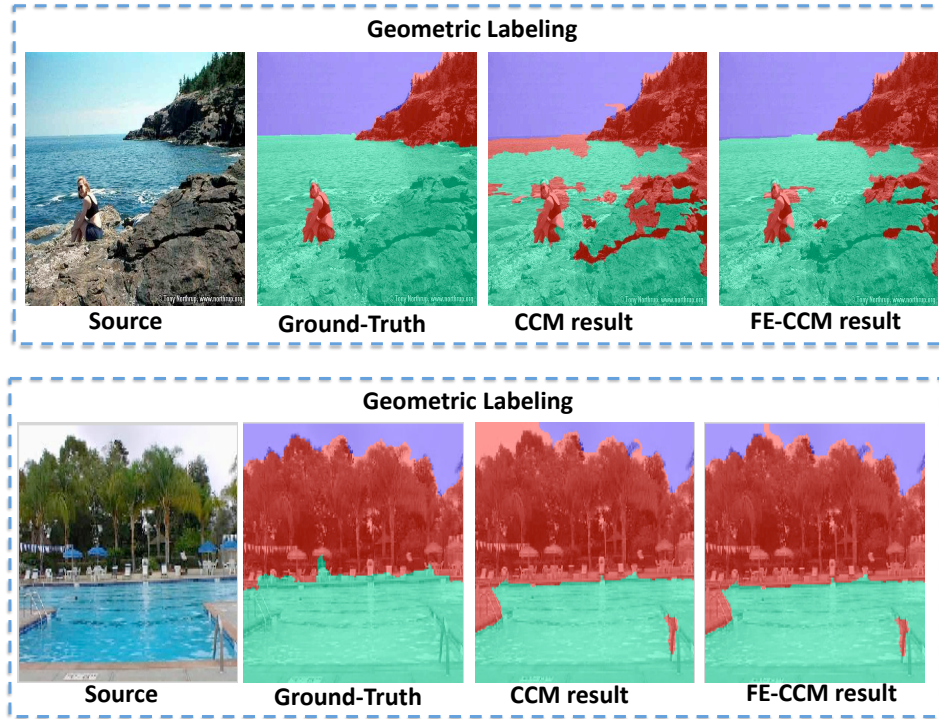

Figure 3: (a) Image from the dataset; (b) Ground truth; (c) Result obtained using CCM; (d) Result obtained using the proposed FE-CCM. (Best viewed in color). Geometric labeling: Green = Support, Blue = Sky, and Red = Vertical class.

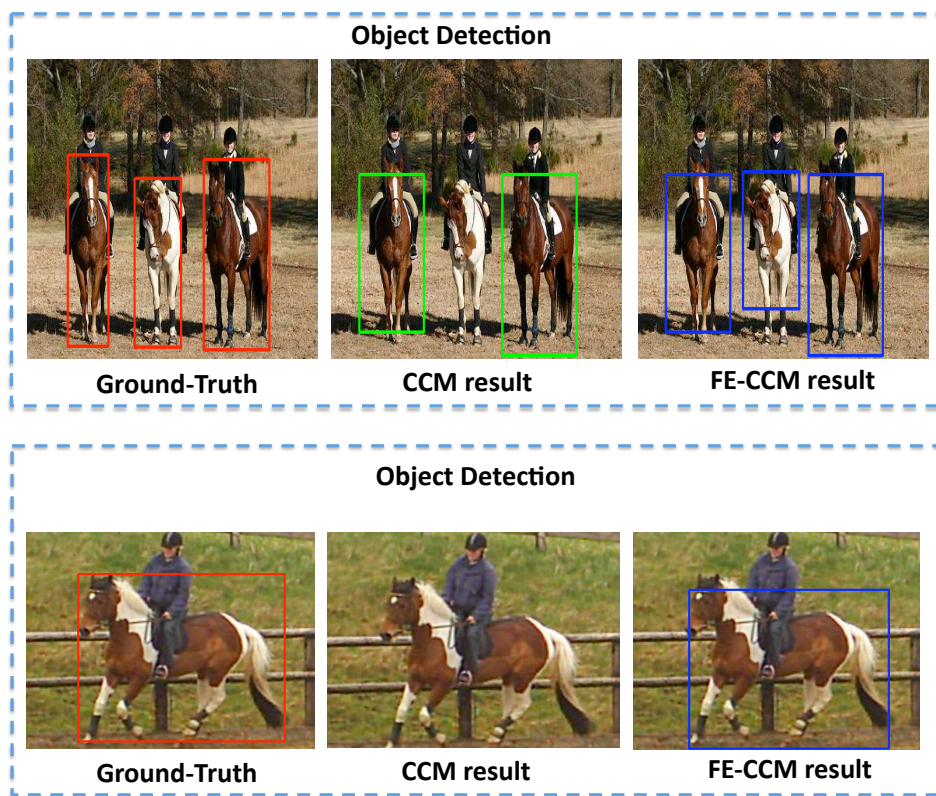

Figure 4: Object detection results for category: horse

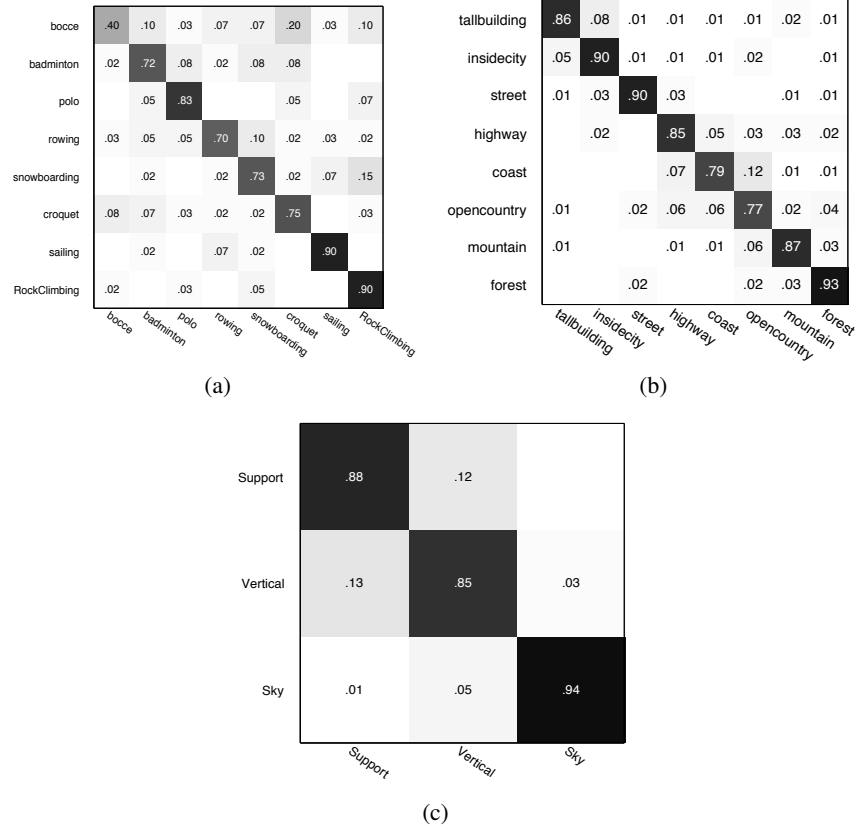

Figure 5: Confusion matrix for (a) Event categorization; (b) Scene categorization; (c) Geometric labeling. All the results are gained with the proposed FE-CCM method. The average accuracy achieved by the proposed FE-CCM model outperforms the state-of-the-art methods for each of these tasks (as metioned in the paper).
